# Supplementary material for: Plastid Genomes of Carnivorous Plants Drosera rotundifolia and Nepenthes × ventrata Reveal Evolutionary Patterns Resembling Those Observed in Parasitic Plants
Source: MDPI journal article supplement (doi:10.3390/ijms20174107), 2019-08-22
Supplement: s1 [file s1]

# Supplemental Figure S1. Predicted protein product of *orf641*

## (A) Amino acid sequence of Orf641

MDKDKKS PDKDKKSPFSKKVWKK APKQPNI GKKEPNI GPKEPYI GPKEPYA  
GQKQLNV GQKQLNV GQKQPNI GQKQPNI GPKEPYV GQKQLNV GQKQPNI  
GQKQPNI GPKEPYV GQKQLNV GQKQANI GKKEPNI GPKEPYA GQKQLNV  
GQKQLNV GQKQPNI GQKQPNI GPKEPYV GQKQLNV GQKQPNI GQKQPNI  
GPKEPYV GQKQLNV GQKQPNI GKKEPYV GPKEPYV GQKQLNV GQKQPNI  
GKKEPYV GPKEPYV GQKQLNV GQKQANI GQKQPNI GQKQPNI GPKEPNI  
GKKPPNL GQKQANI GQKQPNI GQKQPNI GQKQPYI GKKEPYV GPKEPYV  
GQKQLNI GKKQANI SPKQANI GPKQPNI GKKPPNI SPKQPNL GKKPPNL  
GPKQPYV GKKQANI GKMKPYI GKMEPYV GKKQPNV GQKQPYI GQKPPYI  
GKMESNV GQKQPNV GQKQPNV GQKQPYI GQKQPNV GQKQPNV GQKQPYI  
GQKQPNV GQKQPYI GQKSPYI SKKSPYI SKKSPYI SKKSPYI VKKRK  
KGKRPFRI RCPQIKSGDQISYRNVRLINKFLSRKTAEIFPRRITKLTFKQQRLLS  
SAIKQARILSLLPFFKYPEKRFTKDQKRFFKDKTRFKKYKKRRIQKT

N-terminal region containing 73 copies of repeat with GQKQPNI consensus sequence is shown in yellow. Rps18-like region is shown in grey.

## (B) Consensus sequence of the repeat

| Position              | 1                    | 2                      | 3            | 4                                     | 5                             | 6             | 7                             |
|-----------------------|----------------------|------------------------|--------------|---------------------------------------|-------------------------------|---------------|-------------------------------|
| Number of occurrences | G-67;<br>S-5;<br>A-1 | Q-40;<br>K-17;<br>P-16 | K-70;<br>M-3 | Q-46;<br>E-18;<br>S-4;<br>P-4;<br>K-1 | P-52;<br>L-11;<br>A-6;<br>S-4 | N-47;<br>Y-26 | I-39;<br>V-29;<br>L-3;<br>A-2 |

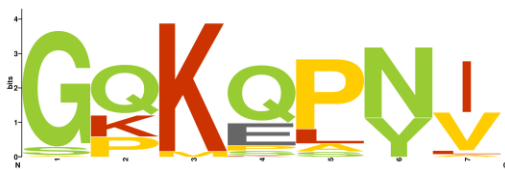

## (C) Alignment of amino acid sequences of Rps18-like region of Orf641 of *Drosera rotundifolia* and 86 a.a. long consensus sequence of chloroplast Rps18 domain (CHL00077)

Orf641 1 MDKDKKS--KGKRPFRI RCPQIKSGDQISYRNVRLINKFLSRKTAEIFPRRITKLTFKQQR 59  
MDK K+ K KR FR R P I+SGD+I Y+N+ L+++F+S + +I RR+T+LT KQQR  
1 MDKSKRPFRKSKRSFRRRLPPIQSGDRIDYKNMSLLSRFIS-EQGKILSRRVTRLTLKQQR 60  
Orf641 60 LLSSAIKQARILSLLPFFKYPEKRFTKDQKRFFKDKTRFKKYKKRRIQKT  
L++ AIKQARILSLLPF EK+F +  
61 LITKAIKQARILSLLPFLNN-EKQFER 86

Rps18-like region in Orf641 is shown in grey.
